# Supplementary material for: Hypusinated eIF5A is expressed in the pancreas and spleen of individuals with type 1 and type 2 diabetes
Source: PubMed Central journal article supplement (PMC7092972; doi:10.1371/journal.pone.0230627), 2020-03-24
Supplement: pone.0230627.s002.pdf [file pone.0230627.s002.pdf]

**A**

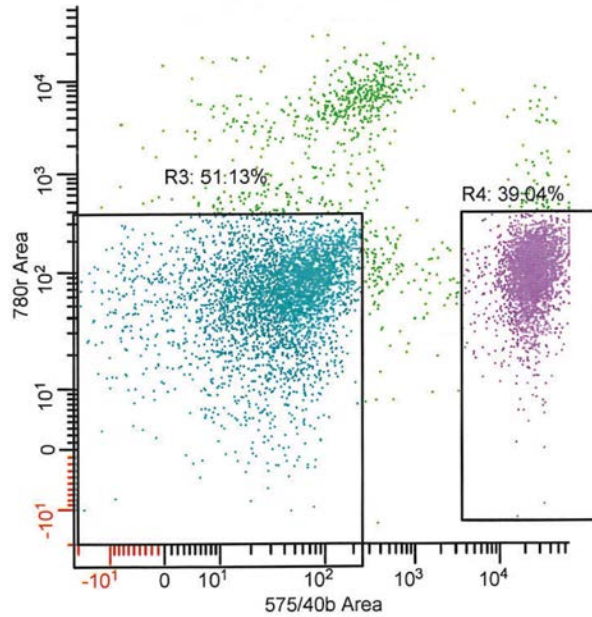

**Supplemental Figure 2. Collection of beta cell and non-beta cell populations by FACS.**

(A) Islets isolated from multiple *RIP-cre;R26R<sup>Tomato</sup>* mice were pooled together and processed for fluorescence activated cell sorting (FACS). Islet cells were sorted into two populations: tomato-positive beta cells (R4), and tomato-negative non-beta cells (R3, islet cells expressing glucagon, somatostatin, ghrelin and pancreatic polypeptide).
