# Supplementary material for: Hypusinated eIF5A is expressed in the pancreas and spleen of individuals with type 1 and type 2 diabetes
Source: PubMed Central journal article supplement (PMC7092972; doi:10.1371/journal.pone.0230627), 2020-03-24
Supplement: pone.0230627.s003.pdf [file pone.0230627.s003.pdf]

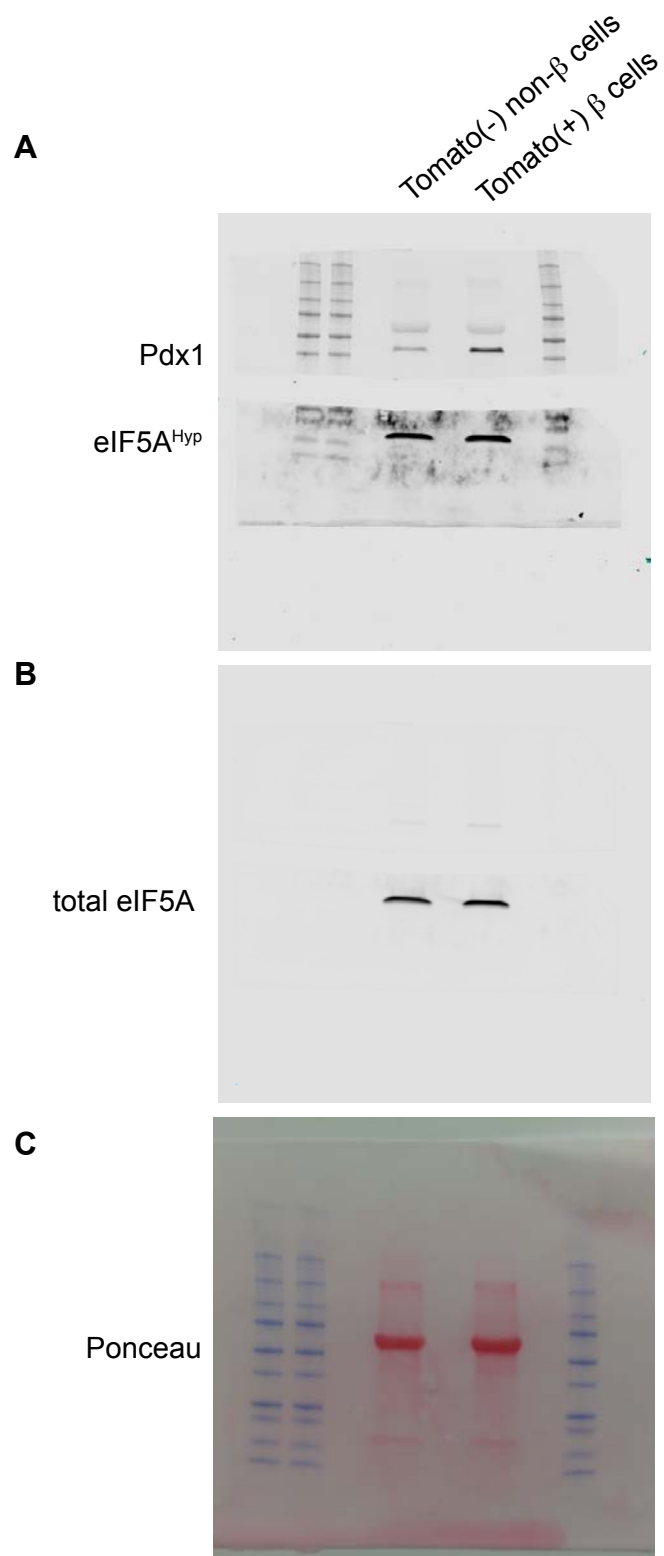

**Supplemental Figure 3. Source images for western blots of FACS sorted mouse islet cell populations.**

(A) Immunoblot for expression of Pdx1 and eIF5A<sup>Hyp</sup> in cell lysates from Tomato-negative non-beta cells and Tomato-positive beta cells. (B) Immunoblot for expression of total eIF5A. (C) Total protein expression as visualized using PonceauS staining.
