# Supplementary material for: Hypusinated eIF5A is expressed in the pancreas and spleen of individuals with type 1 and type 2 diabetes
Source: PubMed Central journal article supplement (PMC7092972; doi:10.1371/journal.pone.0230627), 2020-03-24
Supplement: pone.0230627.s004.pdf [file pone.0230627.s004.pdf]

16hr treatment

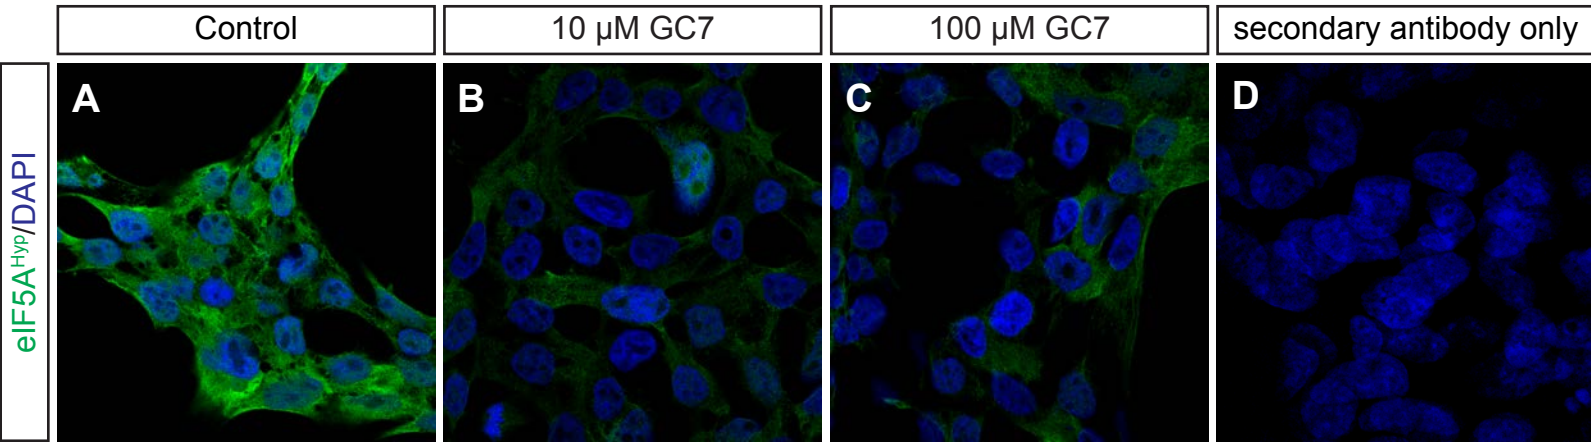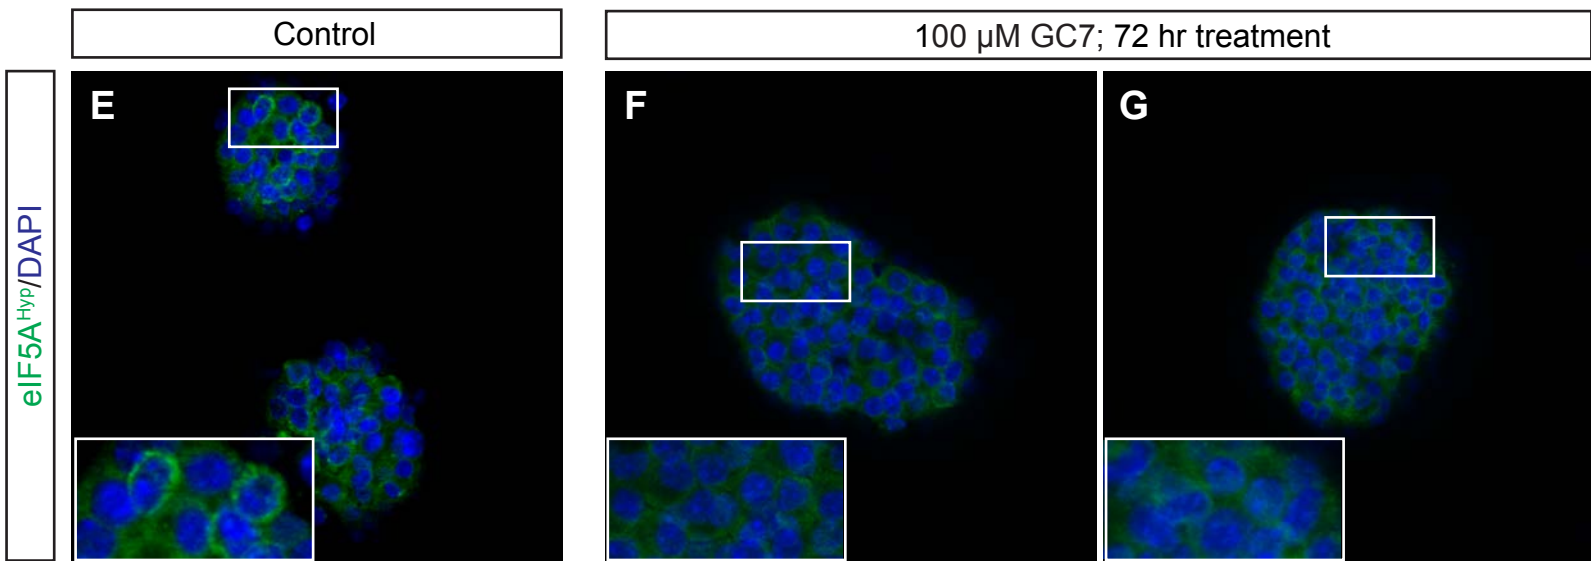

**Supplemental Figure 4. Evaluation of eIF5A<sup>Hyp</sup> expression following treatment with DHPS inhibitor.**

HEK293T cells were treated with the DHPS inhibitor GC7 (N1-Guanyl-1,7-diaminoheptane) and analyzed for eIF5A<sup>Hyp</sup> expression by immunofluorescence. (A) Control HEK293T uniformly expressed eIF5A<sup>Hyp</sup>. (B, C) Treatment with GC7 resulted in reduced expression of eIF5A<sup>Hyp</sup>. (D) A secondary antibody control was also performed to confirm that the observed signal was not an artifact. Mouse pancreatic islets were also treated with GC7 and analyzed for eIF5A<sup>Hyp</sup> expression by immunofluorescence. (E) Control mouse islets contained cells with both weak and robust expression of eIF5A<sup>Hyp</sup>. (F, G) Islets treated with GC7 showed a reduction in expression of eIF5A<sup>Hyp</sup>. Images are 20X. Inset images are higher magnification of the areas outlined with white boxes.
