# Supplementary material for: Hypusinated eIF5A is expressed in the pancreas and spleen of individuals with type 1 and type 2 diabetes
Source: PubMed Central journal article supplement (PMC7092972; doi:10.1371/journal.pone.0230627), 2020-03-24
Supplement: pone.0230627.s008.pdf [file pone.0230627.s008.pdf]

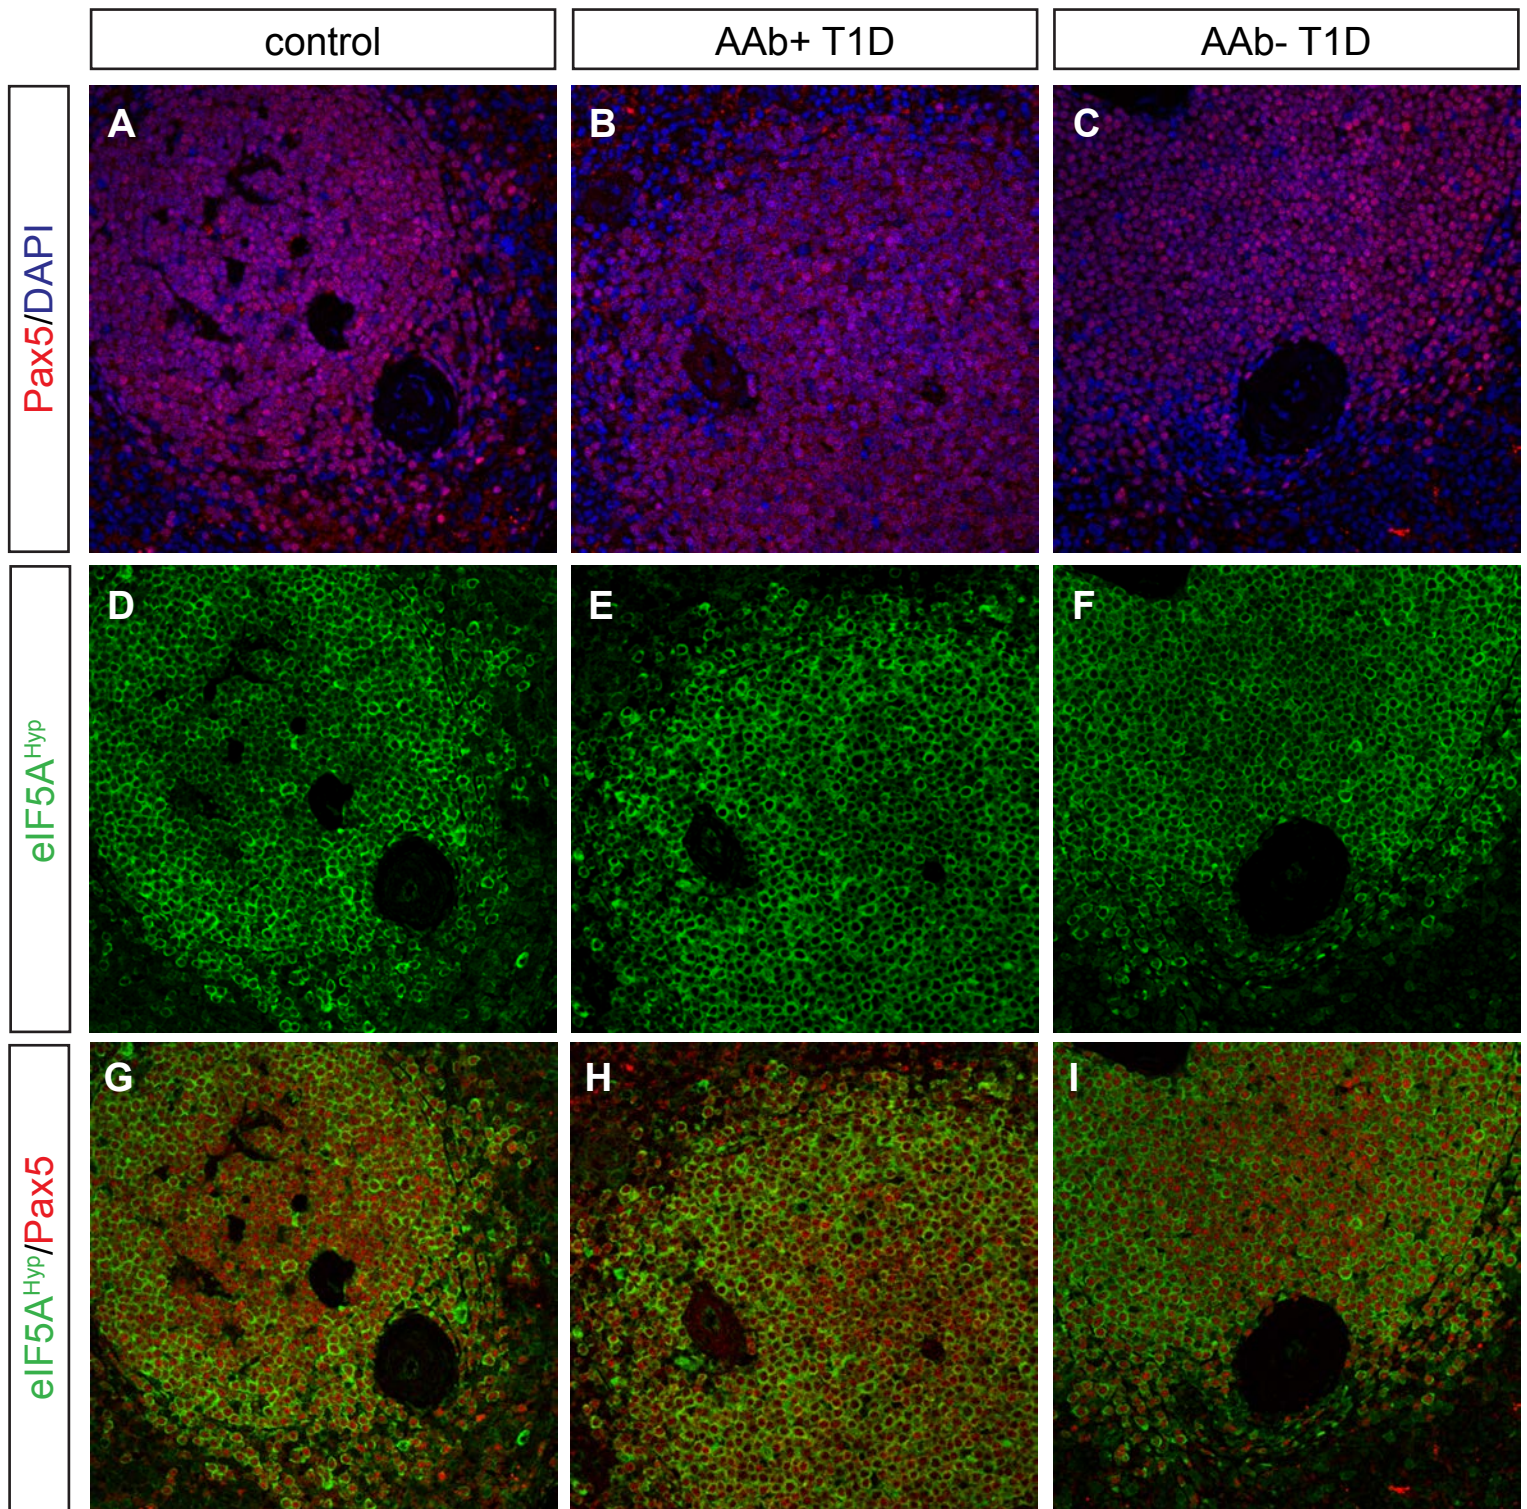

**Supplemental Figure 8. eIF5A<sup>Hyp</sup> expression pattern in the Pax5-expressing B cell population in spleen tissue of control and T1D.**

We evaluated the expression of eIF5A<sup>Hyp</sup> in Pax5-expressing B cells in the spleens of donors with auto-antibody positive (AAb+) and auto-antibody negative (AAb-) T1D, and corresponding controls matched for age, gender, ethnicity, and BMI. The fluorescent channels have been separated to better display the expression patterns of the Pax5-expressing B cells (A - C), eIF5A<sup>Hyp</sup>-expressing cells (D - F), and the overlap between the Pax5-expressing and eIF5A<sup>Hyp</sup>-expressing populations (G - I). All images are 20X.
